# Supplementary material
Source: PubMed Central journal article supplement (PMC6451699)
Supplement: mmc1.pdf [file mmc1.pdf]

**The American Journal of Human Genetics, Volume 104**

**Supplemental Data**

**Disease Heritability Enrichment of Regulatory  
Elements Is Concentrated in Elements with Ancient  
Sequence Age and Conserved Function across Species**

**Margaux L.A. Hujoel, Steven Gazal, Farhad Hormozdiari, Bryce van de Geijn, and Alkes L.  
Price**

Figure S1: **Correlation heat map.** Correlation of the annotations presented in this paper with all functional annotations in baseline-LD model (among common SNPs, MAF  $\geq 0.05$ ). Numerical values found in Table S1

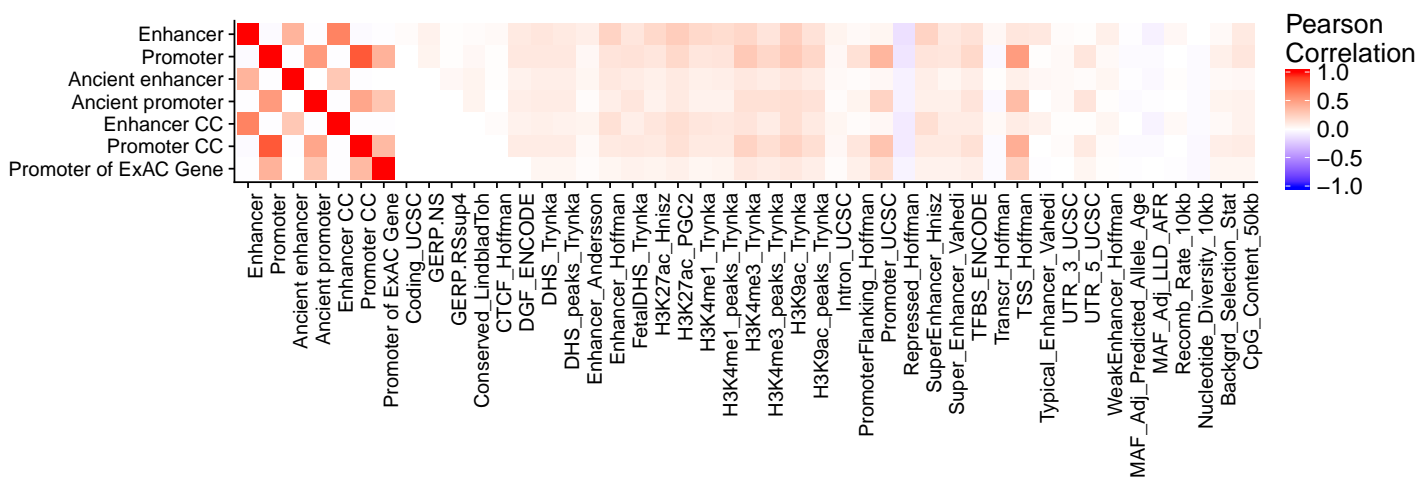

Table S1: **Correlation between main annotations and functional annotations of baseline-LD model.** We report correlation of annotations with all functional annotations in baseline-LD model (among common SNPs,  $MAF \geq 0.05$ ).

See attached Excel file

| Annotation                        | Source                                                                                                                  | Model                |
|-----------------------------------|-------------------------------------------------------------------------------------------------------------------------|----------------------|
| All SNPs                          | Finucane et al. <sup>1</sup>                                                                                            | baseline/baseline-LD |
| Coding                            | UCSC Genome Browser <sup>2</sup> , post-processed by Gusev et al. <sup>3</sup> , Finucane et al. <sup>1</sup>           | baseline/baseline-LD |
| 3' UTR                            | UCSC Genome Browser <sup>2</sup> , post-processed by Gusev et al. <sup>3</sup> , Finucane et al. <sup>1</sup>           | baseline/baseline-LD |
| 5' UTR                            | UCSC Genome Browser <sup>2</sup> , post-processed by Gusev et al. <sup>3</sup> , Finucane et al. <sup>1</sup>           | baseline/baseline-LD |
| Promoter                          | UCSC Genome Browser <sup>2</sup> , post-processed by Gusev et al. <sup>3</sup> , Finucane et al. <sup>1</sup>           | baseline/baseline-LD |
| Intron                            | UCSC Genome Browser <sup>2</sup> , post-processed by Gusev et al. <sup>3</sup> , Finucane et al. <sup>1</sup>           | baseline/baseline-LD |
| Transcription factor binding site | ENCODE <sup>4</sup> , post-processed by Gusev et al. <sup>3</sup> , Finucane et al. <sup>1</sup>                        | baseline/baseline-LD |
| Digital genomic footprint         | ENCODE <sup>4</sup> , post-processed by Gusev et al. <sup>3</sup> , Finucane et al. <sup>1</sup>                        | baseline/baseline-LD |
| CTCF                              | Hoffman et al. <sup>5</sup> and Finucane et al. <sup>1</sup>                                                            | baseline/baseline-LD |
| Promoter-Flanking                 | Hoffman et al. <sup>5</sup> and Finucane et al. <sup>1</sup>                                                            | baseline/baseline-LD |
| Transcribed                       | Hoffman et al. <sup>5</sup> and Finucane et al. <sup>1</sup>                                                            | baseline/baseline-LD |
| Transcription start site (TSS)    | Hoffman et al. <sup>5</sup> and Finucane et al. <sup>1</sup>                                                            | baseline/baseline-LD |
| Enhancer                          | Hoffman et al. <sup>5</sup> and Finucane et al. <sup>1</sup>                                                            | baseline/baseline-LD |
| Weak enhancer                     | Hoffman et al. <sup>5</sup> and Finucane et al. <sup>1</sup>                                                            | baseline/baseline-LD |
| Repressed                         | Hoffman et al. <sup>5</sup> and Finucane et al. <sup>1</sup>                                                            | baseline/baseline-LD |
| DHS                               | ENCODE <sup>4</sup> /Roadmap <sup>6</sup> post-processed by Trynka et al. <sup>7</sup> and Finucane et al. <sup>1</sup> | baseline/baseline-LD |
| Fetal DHS                         | ENCODE <sup>4</sup> /Roadmap <sup>6</sup> post-processed by Trynka et al. <sup>7</sup> and Finucane et al. <sup>1</sup> | baseline/baseline-LD |
| H3K4me1                           | Roadmap Epigenomics <sup>6</sup> , post-processed by Trynka et al. <sup>7</sup> , Finucane et al. <sup>1</sup>          | baseline/baseline-LD |
| H3K4me3                           | Roadmap Epigenomics <sup>6</sup> , post-processed by Trynka et al. <sup>7</sup> , Finucane et al. <sup>1</sup>          | baseline/baseline-LD |
| H3K9ac                            | Roadmap Epigenomics <sup>6</sup> , post-processed by Trynka et al. <sup>7</sup> , Finucane et al. <sup>1</sup>          | baseline/baseline-LD |
| H3K27ac                           | Roadmap Epigenomics <sup>6</sup> , post-processed <sup>8</sup> , Finucane et al. <sup>1</sup>                           | baseline/baseline-LD |
| H3K27ac                           | Hnisz et al. <sup>9</sup> and Finucane et al. <sup>1</sup>                                                              | baseline/baseline-LD |
| Super-enhancer                    | Hnisz et al. <sup>9</sup> and Finucane et al. <sup>1</sup>                                                              | baseline/baseline-LD |
| Conserved                         | Lindblad-Toh et al. <sup>10</sup> , post-processed by Ward and Kellis <sup>11</sup> , Finucane et al. <sup>1</sup>      | baseline/baseline-LD |
| FANTOM5 enhancer                  | Anderson et al. <sup>12</sup> and Finucane et al. <sup>1</sup>                                                          | baseline/baseline-LD |
| Super-enhancer                    | Vahedi et al. <sup>13</sup> , Gazal et al. <sup>14</sup>                                                                | baseline-LD          |
| Typical enhancer                  | Vahedi et al. <sup>13</sup> , Gazal et al. <sup>14</sup>                                                                | baseline-LD          |
| GERP <sup>15</sup> conserved      | GERP++score <sup>15</sup> and Gazal et al. <sup>14</sup>                                                                | baseline-LD          |
| 10 MAF bins                       | Gazal et al. <sup>14</sup>                                                                                              | baseline-LD          |
| Predicted Allele Age              | Gazal et al. <sup>14</sup>                                                                                              | baseline-LD          |
| LLD-AFR                           | Gazal et al. <sup>14</sup>                                                                                              | baseline-LD          |
| Recombination Rate                | Gazal et al. <sup>14</sup>                                                                                              | baseline-LD          |
| Nucleotide Diversity              | Gazal et al. <sup>14</sup>                                                                                              | baseline-LD          |
| Background Selection Statistics   | Gazal et al. <sup>14</sup>                                                                                              | baseline-LD          |
| CpG-Content                       | Gazal et al. <sup>14</sup>                                                                                              | baseline-LD          |

Table S2: **75 functional annotations in baseline-LD model.** 59 annotations define the baseline model: 1 annotation for all SNPs, 27 binary functional annotations and one continuous annotation (there exist 2 GERP conserved annotations, one binary and one continuous)<sup>1,14</sup>, for each binary annotation (excluding the binary GERP related annotation) a 500-bp window around the category is added; for DHS, H3K4me1, H3K4me3, and H3K9ac, a 100-bp window around the peaks is also added as an additional annotation. The baseline-LD model is the baseline model with 16 additional annotations (ten MAF bins and 6 LD-related annotations)<sup>14</sup>.

Table S3: **List of 47 datasets analyzed in this study.** We meta-analyzed all results across a previously chosen collection of 47 datasets<sup>16</sup>. We obtained the summary statistics for each trait from previous published studies where the summary statistics are publicly available. In the case of UK Biobank traits, we computed the summary statistics using BOLT-LMM<sup>17,18</sup>. For some traits we have more than one dataset, thus we have 41 independent traits. However, we utilized all the 47 datasets in our meta-analyses as the number of samples that overlap is low. These traits have been selected based on a heritability z-score  $> 6$ .

See attached Excel file

Table S4: **List of all models analyzed in this study.** We report the set of annotations included in each model analyzed.

See attached Excel file

Table S5: **Enhancer and promoter results.** (A) Meta-analysis results from including the annotations for putative enhancer and promoter conditional on baseline-LD. Both putative enhancers and promoters are enriched for heritability, however only promoter provides unique information for trait heritability conditional on the baseline-LD model. (B) Meta-analysis results from including the annotations for highly reproducible putative enhancer and highly reproducible promoter conditional on baseline-LD. Results using highly reproducible elements are similar as those found using all putative enhancers and promoters.

| <b>A</b> Category            | Prop. | Enr (s.e.)   | Enr p-val | $\tau^*$ (s.e.) | $\tau^*$ p-val |
|------------------------------|-------|--------------|-----------|-----------------|----------------|
| Enhancer                     | 0.033 | 2.61(0.24)   | 2.5e-12   | 0.008(0.032)    | 0.79           |
| Promoter                     | 0.015 | 4.605(0.429) | 3.2e-17   | 0.114(0.043)    | 0.0074         |
| <b>B</b> Category            | Prop. | Enr (s.e.)   | Enr p-val | $\tau^*$ (s.e.) | $\tau^*$ p-val |
| Highly reproducible enhancer | 0.022 | 2.61(0.249)  | 3.8e-10   | -0.004(0.026)   | 0.86           |
| Highly reproducible promoter | 0.013 | 4.655(0.444) | 4.4e-16   | 0.118(0.041)    | 0.0044         |

Table S6: **Sequence age annotations.** Meta-analysis results from models with each sequence age annotation conditioned on the baseline-LD model and putative enhancer and promoter annotations.

| Category              | Prop. | Enr (s.e.)    | Enr p-val | $\tau^*$      | $\tau^*$ p-val |
|-----------------------|-------|---------------|-----------|---------------|----------------|
| Enhancer              | 0.033 | 2.584(0.238)  | 5.6e-12   | 0.241(0.058)  | 3.4e-05        |
| Promoter              | 0.015 | 4.653(0.432)  | 1.5e-17   | 0.127(0.043)  | 0.003          |
| Young enhancer        | 0.014 | -0.134(0.188) | 1.6e-05   | -0.333(0.06)  | 2.5e-08        |
| Enhancer              | 0.033 | 2.581(0.239)  | 6e-12     | 0.013(0.032)  | 0.68           |
| Promoter              | 0.015 | 4.709(0.436)  | 1.3e-17   | 0.462(0.07)   | 3.7e-11        |
| Young promoter        | 0.005 | -1.395(0.433) | 0.0003    | -0.484(0.058) | 1e-16          |
| Enhancer              | 0.033 | 2.61(0.239)   | 2e-12     | 0(0.041)      | 1              |
| Promoter              | 0.015 | 4.612(0.43)   | 3.1e-17   | 0.114(0.043)  | 0.0073         |
| Intermediate enhancer | 0.013 | 2.256(0.36)   | 0.015     | -0.094(0.034) | 0.0058         |
| Enhancer              | 0.033 | 2.613(0.24)   | 2.3e-12   | 0.01(0.032)   | 0.75           |
| Promoter              | 0.015 | 4.632(0.43)   | 3.3e-17   | 0.228(0.061)  | 0.00017        |
| Intermediate promoter | 0.005 | 1.742(0.426)  | 0.26      | -0.207(0.041) | 3.6e-07        |
| Enhancer              | 0.033 | 2.741(0.248)  | 1.3e-13   | -0.184(0.029) | 3e-10          |
| Promoter              | 0.015 | 4.611(0.429)  | 2.5e-17   | 0.135(0.043)  | 0.0016         |
| Ancient enhancer      | 0.005 | 10.102(0.9)   | 3.1e-19   | 0.483(0.06)   | 8.7e-16        |
| Enhancer              | 0.033 | 2.57(0.238)   | 7.3e-12   | 0.021(0.032)  | 0.52           |
| Promoter              | 0.015 | 4.923(0.446)  | 6.9e-19   | -0.225(0.04)  | 1.4e-08        |
| Ancient promoter      | 0.004 | 15.078(1.219) | 4.3e-24   | 0.76(0.072)   | 3.6e-26        |

Table S7: **Joint sequence age model.** Meta-analysis results of joint model with sequence age annotations, the baseline-LD model and putative enhancer and promoter annotations. Only significant sequence age annotations (Bonferroni  $p = 0.05/4 = 0.0125$ ) were retained in the model. (A) Enrichment for annotations as well as the difference of enrichments between annotations and the relevant element annotation ( $\Delta$ ). (B)  $\tau^*$  value and significance. (C) Measures of negative selection on sequence age annotations. These measures (calculated on common SNPs within the annotation) include: the proportion of GERP  $RS \geq 4$ <sup>14,15</sup>, the mean of the background selection statistic (BSS)<sup>14,19</sup>, the proportion conserved<sup>1,10</sup>, the mean of the MAF adjusted predicted allele age (age)<sup>14</sup>, and the mean of nucleotide diversity (10kb) (Nuc. Div.)<sup>14,20</sup>. Standard error is calculated via block-jackknife.

| A Category       | Prop.            | Enr (s.e.)     | Enr p-val      | $\Delta$ (s.e.) | $\Delta$ p-val |
|------------------|------------------|----------------|----------------|-----------------|----------------|
| Enhancer         | 0.033            | 2.692(0.246)   | 4.9e-13        |                 |                |
| Promoter         | 0.015            | 4.903(0.445)   | 8.3e-19        |                 |                |
| Ancient enhancer | 0.005            | 9.283(0.867)   | 3.4e-17        | 6.578(0.685)    | 4.3e-15        |
| Ancient promoter | 0.004            | 14.277(1.179)  | 1.2e-22        | 9.176(0.769)    | 2.1e-18        |
| B Category       | $\tau^*$ (s.e.)  | $\tau^*$ p-val |                |                 |                |
| Enhancer         | -0.156(0.03)     | 1.6e-07        |                |                 |                |
| Promoter         | -0.188(0.039)    | 1.1e-06        |                |                 |                |
| Ancient enhancer | 0.429(0.058)     | 1.2e-13        |                |                 |                |
| Ancient promoter | 0.704(0.068)     | 9e-25          |                |                 |                |
| C Category       | GERP $RS \geq 4$ | BSS            | Conserved      | Age             | Nuc. Div.      |
| Enhancer         | 0.012(1.0e-05)   | 0.21(1.7e-05)  | 0.039(2.5e-05) | -0.031(9.9e-05) | 4.5(3.3e-04)   |
| Promoter         | 0.014(2.7e-05)   | 0.3(5.5e-05)   | 0.071(5.5e-05) | -0.15(2.1e-04)  | 4.2(8.6e-04)   |
| Ancient enhancer | 0.058(1.8e-04)   | 0.24(1.4e-04)  | 0.16(2.3e-04)  | -0.13(6.0e-04)  | 4.1(1.8e-03)   |
| Ancient promoter | 0.041(1.5e-04)   | 0.33(2.0e-04)  | 0.18(3.2e-04)  | -0.29(8.4e-04)  | 3.9(2.9e-03)   |

Table S8: **Joint sequence age model enrichment per trait.** Enrichment (standard error) for putative enhancer, promoter, ancient putative enhancer, and ancient promoter for each trait from the joint model with sequence age annotations, the baseline-LD model and putative enhancer and promoter annotations.

See attached Excel file

Table S9: **Joint sequence age model in liver traits only.** Meta-analysis results across liver traits of joint model with sequence age annotations, the baseline-LD model and putative enhancer and promoter annotations. (A) Enrichment for annotations as well as the difference of enrichments between annotations and the relevant element annotation ( $\Delta$ ). (B)  $\tau^*$  value and significance.

| A Category       | Prop.           | Enr (s.e.)     | Enr. p-val | $\Delta$ (s.e.) | $\Delta$ p-val |
|------------------|-----------------|----------------|------------|-----------------|----------------|
| Enhancer         | 0.033           | 6.561(0.977)   | 0.0015     |                 |                |
| Promoter         | 0.015           | 17.779(2.833)  | 4e-06      |                 |                |
| Ancient enhancer | 0.005           | 8.441(4.118)   | 0.12       | 1.663(4.105)    | 0.79           |
| Ancient promoter | 0.004           | 38.264(6.649)  | 0.0029     | 20.414(5.706)   | 0.021          |
| B Category       | $\tau^*$ (s.e.) | $\tau^*$ p-val |            |                 |                |
| Enhancer         | 1.016(0.28)     | 0.00029        |            |                 |                |
| Promoter         | 1.485(0.473)    | 0.0017         |            |                 |                |
| Ancient enhancer | 0.137(0.338)    | 0.68           |            |                 |                |
| Ancient promoter | 1.94(0.539)     | 0.00032        |            |                 |                |

Table S10: **Sequence age model with ancient sequence age annotation included.** Meta-analysis results from adding the annotation of ancient sequence age (irrespective of putative enhancer/promoter status) to the joint model with sequence age annotations. Regions with ancient sequence age are enriched for heritability, although a portion of this enrichment is explained by ancient putative enhancers and promoters there is still other genomic regions with ancient sequence age that contribute to this enrichment. However, we see that conditional on baseline-LD, putative enhancer, promoter, ancient putative enhancer, and ancient promoter the annotation for ancient sequence age does not provide novel information as quantified via  $\tau^*$ .

| Category         | Prop.  | Enr (s.e.)    | Enr p-val | $\tau^*$ (s.e.) | $\tau^*$ p-val |
|------------------|--------|---------------|-----------|-----------------|----------------|
| Enhancer         | 0.0330 | 2.695(0.246)  | 4.3e-13   | -0.142(0.03)    | 1.9e-06        |
| Promoter         | 0.0150 | 4.908(0.445)  | 7.2e-19   | -0.177(0.038)   | 4.2e-06        |
| Ancient enhancer | 0.0050 | 9.256(0.869)  | 3.6e-17   | 0.425(0.06)     | 1.7e-12        |
| Ancient promoter | 0.0040 | 14.283(1.181) | 1.2e-22   | 0.693(0.071)    | 2.6e-22        |
| Ancient sequence | 0.1040 | 3.375(0.153)  | 7.2e-25   | 0.062(0.051)    | 0.22           |

Table S11: **Ancient sequence age results in non-liver specific putative regulatory elements.** Meta-analysis results of the model with putative regulatory annotations restricted to regions with ancient sequence age from the baseline-LD model (not liver specific). We find the same main result that putative enhancers and promoters with ancient sequence age are enriched for trait heritability.

| Category                         | Prop. SNPs | Enrichment (s.e.) | Enrichment_pval |
|----------------------------------|------------|-------------------|-----------------|
| CTCF_Hoffman                     | 0.024      | 0.384(0.206)      | 0.035           |
| CTCF_Hoffman.ancient             | 0.003      | 4.74(0.703)       | 0.0011          |
| DGF_ENCODE                       | 0.136      | 2.551(0.235)      | 8.8e-13         |
| DGF_ENCODE.ancient               | 0.024      | 8.733(0.768)      | 4.1e-28         |
| DHS_peaks_Trynka                 | 0.111      | 2.233(0.228)      | 7.1e-09         |
| DHS_peaks_Trynka.ancient         | 0.025      | 7.193(0.709)      | 8.7e-23         |
| DHS_Trynka                       | 0.166      | 1.942(0.172)      | 8.1e-09         |
| DHS_Trynka.ancient               | 0.036      | 6.139(0.534)      | 1.9e-24         |
| Enhancer_Andersson               | 0.004      | 3.209(0.873)      | 0.039           |
| Enhancer_Andersson.ancient       | 0.001      | 21.732(2.903)     | 1.1e-10         |
| Enhancer_Hoffman                 | 0.042      | 3.029(0.226)      | 7.1e-14         |
| Enhancer_Hoffman.ancient         | 0.008      | 12.197(0.921)     | 1.9e-26         |
| FetalDHS_Trynka                  | 0.084      | 2.718(0.215)      | 6e-13           |
| FetalDHS_Trynka.ancient          | 0.023      | 7.203(0.61)       | 2.7e-23         |
| H3K27ac_Hnisz                    | 0.389      | 1.639(0.068)      | 5e-40           |
| H3K27ac_Hnisz.ancient            | 0.051      | 5.707(0.29)       | 9.7e-36         |
| H3K27ac_PGC2                     | 0.269      | 1.918(0.1)        | 6.2e-25         |
| H3K27ac_PGC2.ancient             | 0.041      | 6.81(0.386)       | 5.4e-36         |
| H3K4me1_peaks_Trynka             | 0.170      | 2.274(0.102)      | 4.8e-16         |
| H3K4me1_peaks_Trynka.ancient     | 0.030      | 7.75(0.466)       | 7.9e-30         |
| H3K4me1_Trynka                   | 0.424      | 1.755(0.069)      | 5.7e-29         |
| H3K4me1_Trynka.ancient           | 0.066      | 5.13(0.252)       | 7.1e-33         |
| H3K4me3_peaks_Trynka             | 0.042      | 2.991(0.237)      | 6.2e-09         |
| H3K4me3_peaks_Trynka.ancient     | 0.010      | 12.926(0.849)     | 7.4e-27         |
| H3K4me3_Trynka                   | 0.133      | 2.571(0.158)      | 6.2e-24         |
| H3K4me3_Trynka.ancient           | 0.026      | 8.987(0.535)      | 1.3e-37         |
| H3K9ac_peaks_Trynka              | 0.038      | 3.708(0.281)      | 2.2e-10         |
| H3K9ac_peaks_Trynka.ancient      | 0.009      | 13.217(0.851)     | 5e-26           |
| H3K9ac_Trynka                    | 0.125      | 2.62(0.201)       | 1.2e-22         |
| H3K9ac_Trynka.ancient            | 0.027      | 8.384(0.539)      | 3.7e-36         |
| PromoterFlanking_Hoffman         | 0.008      | 1.084(0.516)      | 1               |
| PromoterFlanking_Hoffman.ancient | 0.001      | 12.866(1.248)     | 2.9e-10         |
| Promoter_UCSC                    | 0.046      | 2.118(0.172)      | 5.4e-08         |
| Promoter_UCSC.ancient            | 0.011      | 7.809(0.492)      | 8.2e-22         |
| SuperEnhancer_Hnisz              | 0.167      | 2.047(0.098)      | 1.2e-45         |
| SuperEnhancer_Hnisz.ancient      | 0.023      | 7.204(0.401)      | 1.4e-34         |
| Super_Enhancer_Vahedi            | 0.021      | 3.122(0.228)      | 3.1e-21         |
| Super_Enhancer_Vahedi.ancient    | 0.003      | 8.55(0.866)       | 1.6e-14         |
| TFBS_ENCODE                      | 0.131      | 2.65(0.199)       | 9.6e-18         |
| TFBS_ENCODE.ancient              | 0.024      | 9.162(0.655)      | 5.9e-33         |
| Transcr_Hoffman                  | 0.346      | 1.166(0.033)      | 0.00015         |
| Transcr_Hoffman.ancient          | 0.037      | 4.266(0.202)      | 9.4e-20         |
| TSS_Hoffman                      | 0.018      | 5.741(0.492)      | 6.2e-19         |
| TSS_Hoffman.ancient              | 0.005      | 17.709(1.271)     | 9e-31           |
| Typical_Enhancer_Vahedi          | 0.022      | 2.193(0.188)      | 1.4e-08         |
| Typical_Enhancer_Vahedi.ancient  | 0.003      | 8.206(0.866)      | 1.1e-10         |
| WeakEnhancer_Hoffman             | 0.021      | 2.307(0.23)       | 4.2e-06         |
| WeakEnhancer_Hoffman.ancient     | 0.004      | 11.015(0.941)     | 1.9e-16         |



Table S12: **Roadmap H3K27ac and H3K4me3 annotations** Meta-analysis results of the model with H3K27ac and H3K4me3 annotations from Roadmap<sup>6</sup> based on marks present in 1/10/20 tissues/cell-types, respectively, as well as restricting to regions with ancient sequence age.

| Category                                               | Prop. SNPs | Enrichment (s.e.) | Enrichment_pval |
|--------------------------------------------------------|------------|-------------------|-----------------|
| H3K4me3 $\geq$ 1 tissue-type                           | 0.200      | 1.851(0.071)      | 1.6e-15         |
| H3K4me3 $\geq$ 1 tissue-type $\cap$ ancient seq. age   | 0.033      | 7.695(0.425)      | 1.4e-35         |
| H3K4me3 $\geq$ 10 tissue-types                         | 0.029      | 4.883(0.312)      | 3e-23           |
| H3K4me3 $\geq$ 10 tissue-types $\cap$ ancient seq. age | 0.009      | 13.752(0.77)      | 3.2e-32         |
| H3K4me3 $\geq$ 20 tissue-types                         | 0.019      | 6.368(0.435)      | 1.1e-22         |
| H3K4me3 $\geq$ 20 tissue-types $\cap$ ancient seq. age | 0.007      | 16.261(0.915)     | 1.2e-31         |
| H3K27ac $\geq$ 1 tissue-type                           | 0.325      | 1.843(0.089)      | 1.2e-25         |
| H3K27ac $\geq$ 1 tissue-type $\cap$ ancient seq. age   | 0.051      | 6.231(0.335)      | 1.9e-36         |
| H3K27ac $\geq$ 10 tissue-types                         | 0.058      | 3.631(0.277)      | 7.5e-26         |
| H3K27ac $\geq$ 10 tissue-types $\cap$ ancient seq. age | 0.014      | 11.52(0.834)      | 4.5e-35         |
| H3K27ac $\geq$ 20 tissue-types                         | 0.026      | 4.612(0.393)      | 2.3e-20         |
| H3K27ac $\geq$ 20 tissue-types $\cap$ ancient seq. age | 0.007      | 14.388(1.078)     | 7.2e-31         |

Table S13: **Sequence age model with flanking regions.** To guard against bias due to model misspecification<sup>1</sup>, we repeated our sequence age analysis by including 500bp flanking regions around putative enhancer, promoter, and sequence age annotations. In order to facilitate the creation of 500 BP flanking regions we made bed files for the sequence age annotations which were not needed to make the annotations analyzed in the main analyses. The difference of the proportion of SNPs within main analysis annotations and those created using bed files was  $\leq 2 * 10^{-6}$ .

| Category                  | Prop. | Enr (s.e.)   | Enr p-val | $\tau^*$ (s.e.) | $\tau^*$ p-val |
|---------------------------|-------|--------------|-----------|-----------------|----------------|
| Enhancer                  | 0.033 | 2.266(0.211) | 2.5e-08   | -0.175(0.033)   | 1.3e-07        |
| Enhancer flanking         | 0.010 | 2.012(0.551) | 0.089     | 0.04(0.049)     | 0.42           |
| Promoter                  | 0.015 | 4.933(0.457) | 3.2e-17   | -0.298(0.041)   | 3.3e-13        |
| Promoter flanking         | 0.004 | 0.175(0.862) | 0.41      | -0.126(0.053)   | 0.018          |
| Ancient enhancer          | 0.005 | 8.814(0.795) | 3.5e-15   | 0.416(0.055)    | 3e-14          |
| Ancient enhancer flanking | 0.009 | 1.251(0.351) | 0.49      | -0.007(0.033)   | 0.84           |
| Ancient promoter          | 0.004 | 12.71(1.137) | 6.6e-18   | 0.673(0.067)    | 7.4e-24        |
| Ancient promoter flanking | 0.005 | 3.877(0.502) | 4.1e-05   | 0.265(0.043)    | 7.2e-10        |

Table S14: **Conserved function annotations.** Meta-analysis results from models with each conserved function annotation conditioned on the baseline-LD model and putative enhancer and promoter annotations. Conservation of regulatory function is assessed using 9 other mammalian species. Binary annotations for enhancers and promoters include highly conserved and human-specific reflecting 9 and 0 other species with function at the given regulatory element, respectively. Categorical annotations include conservation count (CC), mapped count (mappedC), and missing count (missingC) reflecting the number of other mammals for which the element is functionally conserved, the underlying sequence of the element aligns but its function is not conserved, and the underlying sequence of the element does not align (is missing), respectively.

| Category                  | Prop. | Enr (s.e.)   | Enr p-val | $\tau^*$ (s.e.) | $\tau^*$ p-val |
|---------------------------|-------|--------------|-----------|-----------------|----------------|
| Enhancer                  | 0.033 | 2.608(0.24)  | 2.6e-12   | 0.008(0.032)    | 0.81           |
| Promoter                  | 0.015 | 4.602(0.429) | 3.6e-17   | 0.086(0.041)    | 0.038          |
| Highly conserved promoter | 0.002 | 5.051(0.637) | 4.1e-07   | 0.017(0.02)     | 0.39           |
| Enhancer                  | 0.033 | 2.558(0.237) | 8.1e-12   | -0.018(0.031)   | 0.56           |
| Promoter                  | 0.015 | 4.59(0.428)  | 4e-17     | 0.112(0.043)    | 0.0087         |
| Highly conserved enhancer | 0.001 | 5.142(0.727) | 7.8e-06   | 0.053(0.015)    | 0.0003         |
| Enhancer                  | 0.033 | 2.61(0.24)   | 2.6e-12   | 0.009(0.032)    | 0.78           |
| Promoter                  | 0.015 | 4.602(0.43)  | 3.6e-17   | 0.135(0.045)    | 0.0028         |
| Human-specific promoter   | 0.003 | 3.024(0.448) | 0.0002    | -0.042(0.019)   | 0.029          |
| Enhancer                  | 0.033 | 2.55(0.236)  | 1.1e-11   | 0.107(0.041)    | 0.0095         |
| Promoter                  | 0.015 | 4.549(0.426) | 6.9e-17   | 0.109(0.042)    | 0.01           |
| Human-specific enhancer   | 0.013 | 0.91(0.184)  | 0.46      | -0.186(0.033)   | 1.4e-08        |
| Enhancer                  | 0.033 | 2.608(0.24)  | 2.8e-12   | 0.009(0.032)    | 0.77           |
| Promoter                  | 0.015 | 4.599(0.43)  | 4.9e-17   | -0.043(0.047)   | 0.35           |
| Promoter CC               | N/A   | N/A          | N/A       | 0.125(0.033)    | 0.00014        |
| Enhancer                  | 0.033 | 2.442(0.23)  | 1.7e-10   | -0.182(0.027)   | 2.2e-11        |
| Promoter                  | 0.015 | 4.504(0.424) | 1.3e-16   | 0.107(0.042)    | 0.011          |
| Enhancer CC               | N/A   | N/A          | N/A       | 0.212(0.032)    | 2.1e-11        |
| Enhancer                  | 0.033 | 2.608(0.24)  | 2.6e-12   | 0.008(0.032)    | 0.79           |
| Promoter                  | 0.015 | 4.604(0.43)  | 4e-17     | 0.112(0.047)    | 0.016          |
| Promoter mappedC          | N/A   | N/A          | N/A       | -0.019(0.019)   | 0.32           |
| Enhancer                  | 0.033 | 2.584(0.239) | 4.7e-12   | 0.034(0.045)    | 0.45           |
| Promoter                  | 0.015 | 4.585(0.424) | 3.4e-17   | 0.113(0.042)    | 0.0076         |
| Enhancer mappedC          | N/A   | N/A          | N/A       | -0.032(0.034)   | 0.35           |
| Enhancer                  | 0.033 | 2.61(0.24)   | 2.4e-12   | 0.009(0.032)    | 0.78           |
| Promoter                  | 0.015 | 4.575(0.429) | 6.4e-17   | 0.188(0.048)    | 8.8e-05        |
| Promoter missingC         | N/A   | N/A          | N/A       | -0.108(0.029)   | 0.00017        |
| Enhancer                  | 0.033 | 2.651(0.243) | 1.3e-12   | 0.098(0.039)    | 0.011          |
| Promoter                  | 0.015 | 4.63(0.431)  | 2.1e-17   | 0.115(0.043)    | 0.0072         |
| Enhancer missingC         | N/A   | N/A          | N/A       | -0.143(0.024)   | 5e-09          |

Table S15: **Joint conserved function model.** Meta-analysis results from joint model with functional count annotations, the baseline-LD model and putative enhancer and promoter annotations. Only significant functional count annotations (Bonferroni  $p = 0.05/8 = 0.00625$ ) were retained in the model. (A) Enrichment for annotations as well as the difference of enrichments between annotations and the relevant element annotation ( $\Delta$ ). The enrichment for the categorical annotations enhancer conservation count (enhancer CC) and promoter conservation count (promoter CC) is shown for a subset of the annotation, namely conserved putative enhancers and promoters ( $CC \geq 5$ ), but is calculated using the model with conservation count variables. (B)  $\tau^*$  value and significance. (C) Measures of negative selection on regulatory function annotations. These measures (calculated on common SNPs within the annotation) include: the proportion of GERP  $RS \geq 4$ <sup>14,15</sup>, the mean of the background selection statistic (BSS)<sup>14,19</sup>, the proportion conserved<sup>1,10</sup>, the mean of the MAF adjusted predicted allele age (age)<sup>14</sup>, and the mean of nucleotide diversity (10kb) (Nuc. Div.)<sup>14,20</sup>. Standard error is calculated via block-jackknife. For categorical annotations (enhancer CC and promoter CC) these measures are shown for conserved enhancers and promoters ( $CC \geq 5$ ).

| <b>A</b> Category  | Prop.            | Enr (s.e.)     | Enr p-val      | $\Delta$ (s.e.) | $\Delta$ p-val |
|--------------------|------------------|----------------|----------------|-----------------|----------------|
| Enhancer           | 0.033            | 2.448(0.23)    | 1.5e-10        |                 |                |
| Promoter           | 0.015            | 4.508(0.425)   | 1.7e-16        |                 |                |
| Conserved enhancer | 0.005            | 4.572(0.429)   | 3.5e-17        | 2.054(0.243)    | 2.6e-12        |
| Conserved promoter | 0.008            | 5.065(0.474)   | 6.4e-16        | 0.559(0.133)    | 0.022          |
| <b>B</b> Category  | $\tau^*$         | $\tau^*$ p-val |                |                 |                |
| Enhancer           | -0.176(0.027)    | 7.1e-11        |                |                 |                |
| Promoter           | -0.016(0.048)    | 0.73           |                |                 |                |
| Enhancer CC        | 0.201(0.031)     | 6.6e-11        |                |                 |                |
| Promoter CC        | 0.092(0.033)     | 0.005          |                |                 |                |
| <b>C</b> Category  | GERP $RS \geq 4$ | BSS            | Conserved      | Age             | NucDiv         |
| Enhancer           | 0.012(1.0e-05)   | 0.21(1.7e-05)  | 0.039(2.5e-05) | -0.031(9.9e-05) | 4.5(3.3e-04)   |
| Promoter           | 0.014(2.7e-05)   | 0.3(5.5e-05)   | 0.071(5.5e-05) | -0.15(2.1e-04)  | 4.2(8.6e-04)   |
| Conserved enhancer | 0.017(7.9e-05)   | 0.24(1.3e-04)  | 0.055(1.5e-04) | -0.047(5.1e-04) | 4(7.6e-04)     |
| Conserved promoter | 0.017(5.4e-05)   | 0.34(1.0e-04)  | 0.084(1.2e-04) | -0.15(4.1e-04)  | 3.8(6.6e-04)   |

Table S16: **Joint conserved function model enrichment per trait.** Enrichment (standard error) for putative enhancer, promoter, conserved putative enhancer, and conserved promoter for each trait from the joint model with putative enhancer conservation count, promoter conservation count, the baseline-LD model and putative enhancer and promoter annotations.

See attached Excel file

Table S17: **Binary conserved function model.** (A) Meta-analysis results of enrichment and  $\tau^*$  for putative enhancers and promoters shared in CC other mammals (CC  $\in \{0, \dots, 9\}$ ). (B) Measures of negative selection on common SNPs within the annotations: the proportion of GERP  $RS \geq 4$ <sup>14,15</sup>, the mean of the background selection statistic (BSS)<sup>14,19</sup>, the proportion conserved<sup>1,10</sup>, the mean of the MAF adjusted predicted allele age (age)<sup>14</sup>, and the mean of nucleotide diversity (10kb) (Nuc. Div.)<sup>14,20</sup>. Standard error is calculated via block-jackknife.

| <b>A</b> Category | Prop.            | Enr (s.e.)    | Enr p-val      | $\tau^*$ (s.e.) | $\tau^*$ p-val |
|-------------------|------------------|---------------|----------------|-----------------|----------------|
| Enh CC=0          | 0.013(39.78%)    | 1.072(0.192)  | 0.98           | -0.12(0.018)    | 5.2e-11        |
| Enh CC=1          | 0.006(17.28%)    | 0.872(0.307)  | 0.47           | -0.093(0.022)   | 2.6e-05        |
| Enh CC=2          | 0.004(11.86%)    | 1.575(0.331)  | 0.22           | -0.045(0.016)   | 0.005          |
| Enh CC=3          | 0.003(8.55%)     | 2.446(0.438)  | 0.011          | 0.007(0.02)     | 0.7            |
| Enh CC=4          | 0.002(6.03%)     | 1.684(0.362)  | 0.66           | -0.03(0.016)    | 0.066          |
| Enh CC=5          | 0.002(5.08%)     | 1.939(0.377)  | 0.073          | -0.023(0.016)   | 0.14           |
| Enh CC=6          | 0.001(3.48%)     | 4.15(0.701)   | 0.00024        | 0.047(0.022)    | 0.034          |
| Enh CC=7          | 0.001(3.21%)     | 2.913(0.554)  | 0.029          | 0.002(0.016)    | 0.9            |
| Enh CC=8          | 0.001(2.58%)     | 2.661(0.53)   | 0.015          | -0.007(0.014)   | 0.58           |
| Enh CC=9          | 0.001(2.15%)     | 4.388(0.676)  | 0.00016        | 0.031(0.016)    | 0.049          |
| Pro CC=0          | 0.003(19.17%)    | 3.072(0.451)  | 0.00014        | -0.001(0.023)   | 0.98           |
| Pro CC=1          | 0.001(7.65%)     | 1.292(0.49)   | 0.62           | -0.04(0.018)    | 0.028          |
| Pro CC=2          | 0.001(6.75%)     | 1.336(0.603)  | 0.7            | -0.048(0.019)   | 0.013          |
| Pro CC=3          | 0.001(7.05%)     | 2.343(0.498)  | 0.015          | -0.024(0.016)   | 0.14           |
| Pro CC=4          | 0.001(6.88%)     | 3.845(0.908)  | 0.013          | 0.014(0.027)    | 0.62           |
| Pro CC=5          | 0.001(7.48%)     | 2.372(0.507)  | 0.0012         | -0.027(0.018)   | 0.13           |
| Pro CC=6          | 0.001(8.11%)     | 4.084(0.617)  | 0.00032        | 0.023(0.019)    | 0.22           |
| Pro CC=7          | 0.001(9.25%)     | 4.481(0.525)  | 1.2e-05        | 0.04(0.019)     | 0.04           |
| Pro CC=8          | 0.002(12.95%)    | 3.95(0.617)   | 0.00012        | 0.027(0.027)    | 0.3            |
| Pro CC=9          | 0.002(14.72%)    | 4.451(0.598)  | 6.9e-06        | 0.038(0.025)    | 0.13           |
| <b>B</b> Category | GERP $RS \geq 4$ | BSS           | Conserved      | Age             | NucDiv         |
| Enh CC=0          | 0.011(2.8e-05)   | 0.19(4.9e-05) | 0.036(5.7e-05) | -0.033(2.5e-04) | 5(1.7e-03)     |
| Enh CC=1          | 0.0096(7.6e-05)  | 0.21(1.2e-04) | 0.033(1.0e-04) | -0.02(5.4e-04)  | 4.4(1.1e-03)   |
| Enh CC=2          | 0.011(1.2e-04)   | 0.22(1.6e-04) | 0.038(1.7e-04) | -0.02(8.2e-04)  | 4.3(1.4e-03)   |
| Enh CC=3          | 0.012(1.5e-04)   | 0.22(2.4e-04) | 0.038(2.3e-04) | -0.016(1.2e-03) | 4.3(2.1e-03)   |
| Enh CC=4          | 0.013(1.8e-04)   | 0.21(3.2e-04) | 0.045(2.8e-04) | -0.043(1.4e-03) | 4.3(2.4e-03)   |
| Enh CC=5          | 0.013(1.4e-04)   | 0.23(3.7e-04) | 0.043(3.7e-04) | -0.022(1.8e-03) | 4.1(2.9e-03)   |
| Enh CC=6          | 0.017(3.8e-04)   | 0.26(6.4e-04) | 0.058(7.4e-04) | -0.054(2.7e-03) | 4(3.9e-03)     |
| Enh CC=7          | 0.015(3.8e-04)   | 0.25(7.3e-04) | 0.053(4.6e-04) | -0.028(3.1e-03) | 4.1(4.7e-03)   |
| Enh CC=8          | 0.02(4.7e-04)    | 0.23(8.8e-04) | 0.063(6.3e-04) | -0.056(4.2e-03) | 4.1(6.5e-03)   |
| Enh CC=9          | 0.024(7.6e-04)   | 0.25(1.1e-03) | 0.07(1.2e-03)  | -0.11(4.1e-03)  | 3.8(6.3e-03)   |
| Pro CC=0          | 0.014(1.1e-04)   | 0.28(2.8e-04) | 0.066(2.8e-04) | -0.11(1.2e-03)  | 5.1(8.5e-03)   |
| Pro CC=1          | 0.0059(3.2e-04)  | 0.23(5.6e-04) | 0.042(5.4e-04) | -0.11(2.7e-03)  | 5.7(2.7e-02)   |
| Pro CC=2          | 0.0091(2.8e-04)  | 0.26(8.2e-04) | 0.054(6.4e-04) | -0.16(3.4e-03)  | 4.5(1.4e-02)   |
| Pro CC=3          | 0.012(3.4e-04)   | 0.27(7.7e-04) | 0.06(5.8e-04)  | -0.17(3.0e-03)  | 4(4.2e-03)     |
| Pro CC=4          | 0.01(1.1e-17)    | 0.28(8.7e-04) | 0.057(7.0e-04) | -0.19(2.9e-03)  | 3.9(4.3e-03)   |
| Pro CC=5          | 0.011(5.2e-04)   | 0.27(6.8e-04) | 0.067(8.1e-04) | -0.13(2.9e-03)  | 4.1(4.7e-03)   |
| Pro CC=6          | 0.014(2.3e-04)   | 0.28(6.1e-04) | 0.074(6.8e-04) | -0.14(2.3e-03)  | 3.9(3.8e-03)   |
| Pro CC=7          | 0.015(3.5e-04)   | 0.32(5.7e-04) | 0.08(6.3e-04)  | -0.15(2.2e-03)  | 4(4.1e-03)     |
| Pro CC=8          | 0.018(1.9e-04)   | 0.34(4.4e-04) | 0.087(4.6e-04) | -0.17(1.6e-03)  | 3.6(2.6e-03)   |
| Pro CC=9          | 0.023(2.4e-04)   | 0.4(4.1e-04)  | 0.097(4.1e-04) | -0.16(1.3e-03)  | 3.5(2.0e-03)   |

Table S18: **Binary conserved function model enrichment per trait.** Enrichment (standard error) for putative enhancers and promoters shared in CC other mammals ( $CC \in \{0, \dots, 9\}$ ) for each trait from the model with 20 binary annotations reflecting putative enhancers and promoters shared in CC other mammals and the baseline-LD model.

See attached Excel file

Table S19: **Joint conserved function model in liver traits only.** Meta-analysis results across liver traits from joint model with functional count annotations, the baseline-LD model and putative enhancer and promoter annotations. (A) Enrichment for annotations as well as the difference of enrichments between annotations and the relevant element annotation ( $\Delta$ ). The enrichment for the categorical annotations enhancer conservation count (enhancer CC) and promoter conservation count (promoter CC) is shown for a subset of the annotation, namely conserved putative enhancers and promoters ( $CC \geq 5$ ), but is calculated using the model with conservation count variables. (B)  $\tau^*$  value and significance.

| <b>A</b> Category  | Prop.           | Enr (s.e.)     | Enr. p-val | $\Delta$ (s.e.) | $\Delta$ p-val |
|--------------------|-----------------|----------------|------------|-----------------|----------------|
| Enhancer           | 0.033           | 6.268(0.959)   | 0.0023     |                 |                |
| Promoter           | 0.015           | 16.327(2.796)  | 3.8e-07    |                 |                |
| Conserved enhancer | 0.005           | 11.846(2.236)  | 0.00044    | 5.827(1.777)    | 0.0017         |
| Conserved promoter | 0.008           | 19.652(3.802)  | 5.2e-05    | 2.119(1.765)    | 0.38           |
| <b>B</b> Category  | $\tau^*$ (s.e.) | $\tau^*$ p-val |            |                 |                |
| Enhancer           | 0.506(0.208)    | 0.015          |            |                 |                |
| Promoter           | 1.758(0.526)    | 0.00083        |            |                 |                |
| Enhancer CC        | 0.733(0.226)    | 0.0012         |            |                 |                |
| Promoter CC        | 0.549(0.43)     | 0.2            |            |                 |                |

Table S20: **Joint conserved function model with binary conserved annotations.** Meta-analysis results of conserved function model with putative enhancer and promoter conservation counts coded as binary annotations reflecting conserved function.

| Category           | Prop. | Enr (s.e.)   | Enr p-val | $\tau^*$ (s.e.) | $\tau^*$ p-val |
|--------------------|-------|--------------|-----------|-----------------|----------------|
| Enhancer           | 0.033 | 2.474(0.232) | 8.8e-11   | -0.097(0.028)   | 0.00049        |
| Promoter           | 0.015 | 4.503(0.426) | 1.8e-16   | 0.019(0.049)    | 0.7            |
| Conserved enhancer | 0.005 | 4.483(0.435) | 2.9e-14   | 0.134(0.022)    | 8e-10          |
| Conserved promoter | 0.008 | 4.981(0.454) | 2.3e-15   | 0.083(0.028)    | 0.0027         |

Table S21: **Conserved function model with flanking regions** To guard against bias due to model misspecification<sup>1</sup>, we repeated our conserved function analysis with binary conserved function annotations (Table S20) by including 500bp flanking regions around putative enhancer, promoter, conserved putative enhancer, and conserved promoter annotations.

| Category                    | Prop. | Enr (s.e.)   | Enr p-val | $\tau^*$ (s.e.) | $\tau^*$ p-val |
|-----------------------------|-------|--------------|-----------|-----------------|----------------|
| Enhancer                    | 0.033 | 1.876(0.189) | 8.1e-05   | -0.137(0.025)   | 8.1e-08        |
| Enhancer flanking           | 0.010 | 2.818(0.606) | 0.0056    | 0.045(0.046)    | 0.33           |
| Promoter                    | 0.015 | 4.417(0.431) | 1.4e-14   | 0.054(0.049)    | 0.26           |
| Promoter flanking           | 0.004 | 0.488(0.853) | 0.58      | -0.136(0.066)   | 0.041          |
| Conserved enhancer          | 0.005 | 3.393(0.352) | 6.2e-08   | 0.1(0.02)       | 7e-07          |
| Conserved enhancer flanking | 0.001 | 5.037(1.565) | 0.063     | 0.06(0.041)     | 0.15           |
| Conserved promoter          | 0.008 | 4.703(0.47)  | 2.9e-12   | 0.049(0.032)    | 0.12           |
| Conserved promoter flanking | 0.002 | 1.452(1.263) | 0.57      | 0.1(0.071)      | 0.16           |

Table S22: **Conserved function model with human-specific promoter annotation added.** Meta-analysis results of adding an annotation for human-specific promoters to our regulatory function model. The value of  $\tau^*$  for the promoter conservation count annotation became larger and more statistically significant.

| Category                | Prop. | Enr (s.e.)   | Enr p-val | $\tau^*$ (s.e.) | $\tau^*$ p-val |
|-------------------------|-------|--------------|-----------|-----------------|----------------|
| Enhancer                | 0.033 | 2.447(0.23)  | 1.5e-10   | -0.176(0.027)   | 7.8e-11        |
| Promoter                | 0.015 | 4.505(0.425) | 2e-16     | -0.088(0.057)   | 0.12           |
| Enhancer CC             | N/A   | N/A          | N/A       | 0.203(0.031)    | 7.9e-11        |
| Promoter CC             | N/A   | N/A          | N/A       | 0.138(0.043)    | 0.0014         |
| Human-specific promoter | 0.003 | 3.113(0.451) | 0.00011   | 0.043(0.026)    | 0.095          |

Table S23: **Gene function annotations.** Meta-analysis results from models with each gene function annotation conditioned on the baseline-LD model and putative enhancer and promoter annotations.

| Category                                | Prop. | Enr (s.e.)    | Enr p-val | $\tau^*$ (s.e.) | $\tau^*$ p-val |
|-----------------------------------------|-------|---------------|-----------|-----------------|----------------|
| Enhancer                                | 0.033 | 2.599(0.24)   | 3.6e-12   | 0.008(0.032)    | 0.79           |
| Promoter                                | 0.015 | 4.779(0.439)  | 1.3e-17   | -0.027(0.042)   | 0.53           |
| Promoter of ancient gene                | 0.011 | 5.24(0.494)   | 8.2e-16   | 0.148(0.039)    | 0.00012        |
| Enhancer                                | 0.033 | 2.579(0.24)   | 6.6e-12   | 0.01(0.032)     | 0.75           |
| Promoter                                | 0.015 | 5.076(0.448)  | 8.7e-20   | 0.013(0.04)     | 0.74           |
| Promoter of ExAC gene                   | 0.002 | 12.365(0.894) | 9.3e-22   | 0.371(0.031)    | 1.5e-32        |
| Enhancer                                | 0.033 | 2.598(0.239)  | 3.4e-12   | 0.009(0.032)    | 0.78           |
| Promoter                                | 0.015 | 4.747(0.437)  | 1.9e-17   | -0.042(0.041)   | 0.31           |
| Promoter of gene<br>with mouse ortholog | 0.011 | 5.132(0.486)  | 1.5e-15   | 0.168(0.041)    | 4e-05          |

Table S24: **Joint gene function model.** Meta-analysis results of joint model with gene function annotations, the baseline-LD model and putative enhancer and promoter annotations. Only significant gene functions annotations (Bonferroni  $p = 0.05/3 = 0.0167$ ) were retained in the model. (A) Enrichment for annotations as well as the difference of enrichments between promoter of ExAC gene and (all) promoter annotation ( $\Delta$ ). (B)  $\tau^*$  value and significance. (C) Measures of negative selection on gene function annotations. These measures (calculated on common SNPs within the annotation) include: the proportion of GERP  $RS \geq 4$ <sup>14,15</sup>, the mean of the background selection statistic (BSS)<sup>14,19</sup>, the proportion conserved<sup>1,10</sup>, the mean of the MAF adjusted predicted allele age (age)<sup>14</sup>, and the mean of nucleotide diversity (10kb) (Nuc. Div.)<sup>14,20</sup>. Standard error is calculated via block-jackknife.

| <b>A</b> Category     | Prop.            | Enr (s.e.)     | Enr p-val      | $\Delta$ (s.e.) | $\Delta$ p-val |
|-----------------------|------------------|----------------|----------------|-----------------|----------------|
| Enhancer              | 0.033            | 2.579(0.24)    | 6.6e-12        |                 |                |
| Promoter              | 0.015            | 5.076(0.448)   | 8.7e-20        |                 |                |
| Promoter of ExAC gene | 0.002            | 12.365(0.894)  | 9.3e-22        | 6.805(0.491)    | 9.1e-16        |
| <b>B</b> Category     | $\tau^*$ (s.e.)  | $\tau^*$ p-val |                |                 |                |
| Enhancer              | 0.01(0.032)      | 0.75           |                |                 |                |
| Promoter              | 0.013(0.04)      | 0.74           |                |                 |                |
| Promoter of ExAC gene | 0.371(0.031)     | 1.5e-32        |                |                 |                |
| <b>C</b> Category     | GERP $RS \geq 4$ | BSS            | Conserved      | Age             | Nuc. Div.      |
| Enhancer              | 0.012(1.0e-05)   | 0.21(1.7e-05)  | 0.039(2.5e-05) | -0.031(9.9e-05) | 4.5(3.3e-04)   |
| Promoter              | 0.014(2.7e-05)   | 0.3(5.5e-05)   | 0.071(5.5e-05) | -0.15(2.1e-04)  | 4.2(8.6e-04)   |
| Promoter of ExAC gene | 0.024(1.9e-04)   | 0.38(3.4e-04)  | 0.12(4.0e-04)  | -0.25(1.3e-03)  | 3.4(1.6e-03)   |

Table S25: **Joint gene function model enrichment per trait.** Enrichment (standard error) for putative enhancer, promoter, and promoter of ExAC gene for each trait from the joint model with promoter of ExAC gene, the baseline-LD model and putative enhancer and promoter annotations.

See attached Excel file

Table S26: **Joint gene function model in liver traits only.** Meta-analysis results across liver traits of joint model with gene function annotations, the baseline-LD model and putative enhancer and promoter annotations. (A) Enrichment for annotations as well as the difference of enrichments between promoter of ExAC gene and (all) promoter annotation ( $\Delta$ ). (B)  $\tau^*$  value and significance.

| <b>A</b> Category     | Prop.           | Enr (s.e.)     | Enr. p-val | $\Delta$ (s.e.) | $\Delta$ p-val |
|-----------------------|-----------------|----------------|------------|-----------------|----------------|
| Enhancer              | 0.033           | 6.653(1.003)   | 0.0015     |                 |                |
| Promoter              | 0.015           | 17.585(2.789)  | 2.1e-06    |                 |                |
| Promoter of ExAC gene | 0.002           | 26.947(4.795)  | 0.0056     | 7.285(4.132)    | 0.18           |
| <b>B</b> Category     | $\tau^*$ (s.e.) | $\tau^*$ p-val |            |                 |                |
| Enhancer              | 1.03(0.225)     | 4.5e-06        |            |                 |                |
| Promoter              | 2.189(0.471)    | 3.4e-06        |            |                 |                |
| Promoter of ExAC gene | 0.481(0.243)    | 0.048          |            |                 |                |

Table S27: **Gene function model with flanking regions.** To guard against bias due to model misspecification<sup>1</sup>, we repeated our gene function analysis by including 500bp flanking regions around putative enhancer, promoter, and promoter of ExAC gene annotations.

| Category                       | Prop. | Enr (s.e.)    | Enr p-val | $\tau^*$ (s.e.) | $\tau^*$ p-val |
|--------------------------------|-------|---------------|-----------|-----------------|----------------|
| Enhancer                       | 0.033 | 2.124(0.202)  | 4.8e-07   | -0.043(0.028)   | 0.12           |
| Enhancer flanking              | 0.010 | 2.19(0.568)   | 0.056     | 0.057(0.05)     | 0.26           |
| Promoter                       | 0.015 | 4.963(0.453)  | 2.1e-17   | 0.02(0.039)     | 0.61           |
| Promoter flanking              | 0.004 | 0.614(0.886)  | 0.68      | -0.099(0.055)   | 0.072          |
| Promoter of ExAC gene          | 0.002 | 11.174(0.879) | 7.4e-17   | 0.32(0.035)     | 9.3e-20        |
| Promoter of ExAC gene flanking | 0.001 | 4.045(2.031)  | 0.09      | 0.09(0.051)     | 0.075          |

Table S28: **Gene function model with functional annotations based on molecular quantitative trait loci.** Meta-analysis results when including the annotations for Max CPP (allGenes) and MaxCPP (ExAC), where these latter two annotations are found with a fixed effect meta-analysis (FE-Meta-Tissue) of GTEx data<sup>16,21</sup> to the gene function model. Even conditional on both Max CPP and MaxCPP of ExAC Genes we find that promoter of an ExAC LoF gene is still conditionally significant although the  $\tau^*$  value is slightly smaller than when we exclude these two annotations.

| Category              | Prop. | Enr (s.e.)    | Enr p-val | $\tau^*$ (s.e.) | $\tau^*$ p-val |
|-----------------------|-------|---------------|-----------|-----------------|----------------|
| Enhancer              | 0.033 | 2.6(0.24)     | 3.9e-12   | 0.017(0.032)    | 0.59           |
| Promoter              | 0.015 | 4.605(0.434)  | 1.2e-16   | 0.002(0.039)    | 0.96           |
| Promoter of ExAC gene | 0.002 | 10.971(0.848) | 7.1e-19   | 0.313(0.029)    | 3.7e-27        |
| MaxCPP (allGenes)     | N/A   | N/A           | N/A       | 0.406(0.047)    | 4.3e-18        |
| MaxCPP (ExAC)         | N/A   | N/A           | N/A       | 0.352(0.041)    | 1.3e-17        |



Table S29: **Final joint model.** Meta-analysis results of final model with regulatory and sequence conservation as well as gene function annotations, the baseline-LD model and putative enhancer and promoter annotations. (A) Enrichment for annotations and the difference of enrichments between annotations and (all) putative enhancer and (all) promoter annotations ( $\Delta$ ). The enrichment for putative enhancer conservation count (CC) is shown for a subset of the annotation, namely conserved putative enhancers ( $CC \geq 5$ ), but is calculated using the model with putative enhancer conservation count annotation. (B)  $\tau^*$  value and significance. (C) Measures of negative selection on annotations within final joint model. These measures (calculated on common SNPs within the annotation) include: the proportion of GERP  $RS \geq 4$ <sup>14,15</sup>, the mean of the background selection statistic (BSS)<sup>14,19</sup>, the proportion conserved<sup>1,10</sup>, the mean of the MAF adjusted predicted allele age (age)<sup>14</sup>, and the mean of nucleotide diversity (10kb) (Nuc. Div.)<sup>14,20</sup>. Standard error is calculated via block-jackknife. For the categorical annotation enhancer CC these measures are shown for conserved enhancers ( $CC \geq 5$ ).

| A Category            | Prop.            | Enr (s.e.)      | Enr p-val      | $\Delta$ (s.e.) | $\Delta$ p-val |
|-----------------------|------------------|-----------------|----------------|-----------------|----------------|
| Enhancer              | 0.033            | 2.534(0.238)    | 3.1e-11        |                 |                |
| Promoter              | 0.015            | 5.139(0.451)    | 5.1e-20        |                 |                |
| Ancient enhancer      | 0.005            | 8.761(0.835)    | 4.9e-16        | 6.243(0.662)    | 2.7e-14        |
| Ancient promoter      | 0.004            | 13.451(1.158)   | 5.1e-21        | 8.201(0.755)    | 5.2e-16        |
| Conserved enhancer    | 0.005            | 4.614(0.433)    | 2.7e-17        | 2.012(0.244)    | 5.2e-12        |
| Promoter of ExAC gene | 0.002            | 11.958(0.872)   | 4.5e-21        | 6.39(0.481)     | 8.3e-15        |
| B Category            |                  | $\tau^*$ (s.e.) | $\tau^*$ p-val |                 |                |
| Enhancer              |                  | -0.27(0.034)    | 2.6e-15        |                 |                |
| Promoter              |                  | -0.216(0.038)   | 9.3e-09        |                 |                |
| Ancient enhancer      |                  | 0.388(0.055)    | 2.1e-12        |                 |                |
| Ancient promoter      |                  | 0.572(0.067)    | 1e-17          |                 |                |
| Enhancer CC           |                  | 0.161(0.028)    | 1.3e-08        |                 |                |
| Promoter of ExAC gene |                  | 0.283(0.03)     | 2.3e-21        |                 |                |
| C Category            | GERP $RS \geq 4$ | BSS             | Conserved      | Age             | Nuc. Div.      |
| Enhancer              | 0.012(1.0e-05)   | 0.21(1.7e-05)   | 0.039(2.5e-05) | -0.031(9.9e-05) | 4.5(3.3e-04)   |
| Promoter              | 0.014(2.7e-05)   | 0.3(5.5e-05)    | 0.071(5.5e-05) | -0.15(2.1e-04)  | 4.2(8.6e-04)   |
| Ancient enhancer      | 0.058(1.8e-04)   | 0.24(1.4e-04)   | 0.16(2.3e-04)  | -0.13(6.0e-04)  | 4.1(1.8e-03)   |
| Ancient promoter      | 0.041(1.5e-04)   | 0.33(2.0e-04)   | 0.18(3.2e-04)  | -0.29(8.4e-04)  | 3.9(2.9e-03)   |
| Conserved enhancer    | 0.017(7.9e-05)   | 0.24(1.3e-04)   | 0.055(1.5e-04) | -0.047(5.1e-04) | 4(7.6e-04)     |
| Promoter of ExAC gene | 0.024(1.9e-04)   | 0.38(3.4e-04)   | 0.12(4.0e-04)  | -0.25(1.3e-03)  | 3.4(1.6e-03)   |

Table S30: **Final joint model enrichment per trait.** Enrichment (standard error) for putative enhancer, promoter, conserved putative enhancer, ancient putative enhancer, ancient promoter, and promoter of ExAC gene for each trait from the joint model with ancient putative enhancer, putative enhancer conservation count, ancient promoter, promoter of ExAC gene, the baseline-LD model and putative enhancer and promoter annotations.

See attached Excel file

Table S31: **Final joint model in liver traits only.** Meta-analysis results across liver traits of final model with regulatory and sequence conservation as well as gene function annotations, the baseline-LD model and putative enhancer and promoter annotations. Only significant annotations (Bonferroni  $p = 0.05/15 = 0.0033$ ) were retained in the model. (A) Enrichment for annotations and the difference of enrichments between annotations and (all) enhancer and (all) promoter annotations ( $\Delta$ ). The enrichment for putative enhancer conservation count (CC) is shown for a subset of the annotation, namely conserved putative enhancers ( $CC \geq 5$ ), but is calculated using the model with putative enhancer conservation count annotation. (B)  $\tau^*$  value and significance.

| <b>A</b> Category     | Prop.           | Enr (s.e.)     | Enr. p-val | $\Delta$ (s.e.) | $\Delta$ p-val |
|-----------------------|-----------------|----------------|------------|-----------------|----------------|
| Enhancer              | 0.033           | 6.065(0.939)   | 0.0024     |                 |                |
| Promoter              | 0.015           | 17.823(2.791)  | 6e-06      |                 |                |
| Ancient enhancer      | 0.005           | 6.403(4.166)   | 0.3        | 0.16(4.179)     | 0.93           |
| Ancient promoter      | 0.004           | 36.732(6.644)  | 0.0028     | 19.001(5.745)   | 0.022          |
| Conserved enhancer    | 0.005           | 11.584(2.177)  | 0.00065    | 5.785(1.751)    | 0.0016         |
| Promoter of ExAC gene | 0.002           | 26.32(4.812)   | 0.0061     | 6.389(4.107)    | 0.23           |
| <b>B</b> Category     | $\tau^*$ (s.e.) | $\tau^*$ p-val |            |                 |                |
| Enhancer              | 0.538(0.257)    | 0.037          |            |                 |                |
| Promoter              | 1.442(0.471)    | 0.0022         |            |                 |                |
| Ancient enhancer      | -0.03(0.344)    | 0.93           |            |                 |                |
| Ancient promoter      | 1.772(0.55)     | 0.0013         |            |                 |                |
| Enhancer CC           | 0.748(0.227)    | 0.00098        |            |                 |                |
| Promoter of ExAC gene | 0.264(0.261)    | 0.31           |            |                 |                |

Table S32: **Final joint model with binary regulatory function annotations.** Meta-analysis results of final model with putative enhancer conservation count coded as a binary annotation reflecting conserved function.

| Category              | Prop. | Enr (s.e.)    | Enr p-val | $\tau^*$ (s.e.) | $\tau^*$ p-val |
|-----------------------|-------|---------------|-----------|-----------------|----------------|
| Enhancer              | 0.033 | 2.563(0.24)   | 2e-11     | -0.212(0.031)   | 9.1e-12        |
| Promoter              | 0.015 | 5.159(0.453)  | 4e-20     | -0.215(0.038)   | 1.1e-08        |
| Ancient enhancer      | 0.005 | 8.811(0.84)   | 5.8e-16   | 0.392(0.056)    | 1.7e-12        |
| Ancient promoter      | 0.004 | 13.503(1.165) | 4.2e-21   | 0.574(0.067)    | 1.2e-17        |
| Conserved enhancer    | 0.005 | 4.398(0.432)  | 7.8e-14   | 0.092(0.018)    | 5.9e-07        |
| Promoter of ExAC gene | 0.002 | 11.991(0.875) | 3.9e-21   | 0.283(0.03)     | 2.4e-21        |

Table S33: **Final joint model with flanking regions.** To guard against bias due to model misspecification<sup>1</sup>, we repeated our final joint with binary conserved putative enhancer rather than putative enhancer conservation count including 500bp flanking regions around all introduced binary annotations (Table S32).

| Category                       | Prop. | Enr (s.e.)    | Enr p-val | $\tau^*$ (s.e.) | $\tau^*$ p-val |
|--------------------------------|-------|---------------|-----------|-----------------|----------------|
| Enhancer                       | 0.033 | 2.036(0.198)  | 4.2e-06   | -0.219(0.034)   | 1.3e-10        |
| Enhancer flanking              | 0.010 | 2.37(0.579)   | 0.029     | 0.017(0.044)    | 0.7            |
| Promoter                       | 0.015 | 5.085(0.458)  | 6.8e-18   | -0.3(0.041)     | 4.5e-13        |
| Promoter flanking              | 0.004 | 0.47(0.878)   | 0.6       | -0.163(0.056)   | 0.0038         |
| Ancient enhancer               | 0.005 | 8.38(0.753)   | 2.1e-14   | 0.385(0.052)    | 1.2e-13        |
| Ancient enhancer flanking      | 0.009 | 1.06(0.348)   | 0.75      | -0.027(0.034)   | 0.42           |
| Ancient promoter               | 0.004 | 12.001(1.12)  | 1.3e-16   | 0.55(0.065)     | 4.4e-17        |
| Ancient promoter flanking      | 0.005 | 4.192(0.501)  | 7e-06     | 0.232(0.043)    | 9.4e-08        |
| Conserved enhancer             | 0.005 | 3.456(0.358)  | 3e-08     | 0.076(0.02)     | 0.00014        |
| Conserved enhancer flanking    | 0.001 | 3.772(1.466)  | 0.17      | 0.04(0.041)     | 0.33           |
| Promoter of ExAC gene          | 0.002 | 10.749(0.855) | 3.5e-16   | 0.227(0.035)    | 8.6e-11        |
| Promoter of ExAC gene flanking | 0.001 | 4.378(2.029)  | 0.069     | 0.097(0.051)    | 0.056          |

Table S34: **Final joint model with additional promoter annotations.** Meta-analysis results are shown for the final joint model incorporating both promoter conservation count (CC) and human specific promoter annotations.

| Category                | Prop. | Enr (s.e.)    | Enr p-val | $\tau^*$ (s.e.) | $\tau^*$ p-val |
|-------------------------|-------|---------------|-----------|-----------------|----------------|
| Enhancer                | 0.033 | 2.535(0.238)  | 3e-11     | -0.27(0.034)    | 2e-15          |
| Promoter                | 0.015 | 5.148(0.453)  | 6.4e-20   | -0.232(0.052)   | 6.4e-06        |
| Ancient enhancer        | 0.005 | 8.782(0.834)  | 4e-16     | 0.39(0.055)     | 1.5e-12        |
| Ancient promoter        | 0.004 | 13.452(1.16)  | 5.4e-21   | 0.576(0.067)    | 6.9e-18        |
| Enhancer CC             | N/A   | N/A           | N/A       | 0.161(0.028)    | 1.3e-08        |
| Promoter CC             | N/A   | N/A           | N/A       | 0.004(0.042)    | 0.93           |
| Promoter of ExAC gene   | 0.002 | 11.971(0.874) | 4.6e-21   | 0.286(0.03)     | 3.4e-21        |
| Human-specific promoter | 0.003 | 3.749(0.489)  | 3.9e-06   | -0.007(0.026)   | 0.78           |

Table S35: **Final joint model with functional annotations based on molecular quantitative trait loci.** (A) Meta-analysis results when including the annotations for Max CPP (allGenes) and MaxCPP (ExAC), where these latter two annotations are found with a fixed effect meta-analysis (FE-Meta-Tissue) of GTEx data<sup>16,21</sup> to the final joint model. Even conditional on both Max CPP and MaxCPP of ExAC Genes we find that all our annotations remain conditionally significant. (B) Meta-analysis results when including the annotations for Max CPP (allGenes), MaxCPP (ExAC), as well as Max CPP (allGenes) restricted to regions with ancient sequence age to the final joint model. Conditional on these 3 additional annotations, we find that all our annotations remain conditionally significant. The conditional eQTL signal is concentrated in MaxCPP (allGenes) intersected with ancient sequence age.

| <b>A</b> Category                                | Prop. | Enr (s.e.)    | Enr p-val | $\tau^*$ (s.e.) | $\tau^*$ p-val |
|--------------------------------------------------|-------|---------------|-----------|-----------------|----------------|
| Enhancer                                         | 0.033 | 2.547(0.238)  | 2.3e-11   | -0.267(0.034)   | 7.8e-15        |
| Promoter                                         | 0.015 | 4.666(0.437)  | 7.2e-17   | -0.218(0.037)   | 5.2e-09        |
| Ancient Enhancer                                 | 0.005 | 8.632(0.831)  | 1.2e-15   | 0.377(0.055)    | 6.7e-12        |
| Ancient Promoter                                 | 0.004 | 12.536(1.128) | 3.5e-19   | 0.547(0.066)    | 1.1e-16        |
| Enhancer CC                                      | N/A   | N/A           | N/A       | 0.169(0.029)    | 4.3e-09        |
| Promoter of ExAC Gene                            | 0.002 | 10.596(0.826) | 3.2e-18   | 0.231(0.028)    | 5.1e-16        |
| MaxCPP (allGenes)                                | N/A   | N/A           | N/A       | 0.393(0.046)    | 1.8e-17        |
| MaxCPP (ExAC)                                    | N/A   | N/A           | N/A       | 0.347(0.041)    | 2.2e-17        |
| <b>B</b> Category                                | Prop. | Enr (s.e.)    | Enr p-val | $\tau^*$ (s.e.) | $\tau^*$ p-val |
| Enhancer                                         | 0.033 | 2.55(0.238)   | 2.2e-11   | -0.255(0.034)   | 9.5e-14        |
| Promoter                                         | 0.015 | 4.668(0.437)  | 6.9e-17   | -0.194(0.037)   | 1.3e-07        |
| Ancient Enhancer                                 | 0.005 | 8.53(0.827)   | 2.4e-15   | 0.336(0.053)    | 1.9e-10        |
| Ancient Promoter                                 | 0.004 | 12.37(1.128)  | 7.9e-19   | 0.479(0.066)    | 2.6e-13        |
| Enhancer CC                                      | N/A   | N/A           | N/A       | 0.17(0.029)     | 3.5e-09        |
| Promoter of ExAC Gene                            | 0.002 | 10.553(0.824) | 4.1e-18   | 0.234(0.028)    | 1.4e-16        |
| MaxCPP (allGenes)                                | N/A   | N/A           | N/A       | 0.17(0.044)     | 0.0001         |
| MaxCPP (ExAC)                                    | N/A   | N/A           | N/A       | 0.329(0.04)     | 4.1e-16        |
| MaxCPP (allGenes)<br>$\cap$ ancient sequence age | N/A   | N/A           | N/A       | 0.484(0.066)    | 1.5e-13        |

## References

- [1] Hilary K Finucane, Brendan Bulik-Sullivan, Alexander Gusev, et al. Partitioning heritability by functional annotation using genome-wide association summary statistics. *Nature Genetics*, 47(11): 1228–1235, 2015. ISSN 1061-4036, 1546-1718. doi: 10.1038/ng.3404. URL <http://www.nature.com/articles/ng.3404>.
- [2] W. James Kent, Charles W. Sugnet, Terrence S. Furey, et al. The human genome browser at UCSC. *Genome Research*, 12:996–1006, 2002.
- [3] Alexander Gusev, S.A Hong Lee, Gosia Trynka, et al. Partitioning heritability of regulatory and cell-type-specific variants across 11 common diseases. *The American Journal of Human Genetics*, 95(5):535–552, 2014. ISSN 00029297. doi: 10.1016/j.ajhg.2014.10.004. URL <http://linkinghub.elsevier.com/retrieve/pii/S0002929714004261>.
- [4] The ENCODE Project Consortium. An integrated encyclopedia of dna elements in the human genome. *Nature*, 489:57–74, 2012.
- [5] Michael M. Hoffman, Jason Ernst, Steven P. Wilder, et al. Integrative annotation of chromatin elements from ENCODE data. *Nucleic Acids Research*, 41(2):827–841, 2013. ISSN 1362-4962, 0305-1048. doi: 10.1093/nar/gks1284. URL <https://academic.oup.com/nar/article-lookup/doi/10.1093/nar/gks1284>.
- [6] Roadmap Epigenomics Consortium, Anshul Kundaje, Wouter Meuleman, et al. Integrative analysis of 111 reference human epigenomes. *Nature*, 518(7539):317–330, 2015. ISSN 0028-0836, 1476-4687. doi: 10.1038/nature14248. URL <http://www.nature.com/articles/nature14248>.
- [7] Gosia Trynka, Cynthia Sandor, Buhm Han, et al. Chromatin marks identify critical cell types for fine mapping complex trait variants. *Nature Genetics*, 45(2):124–130, 2013. ISSN 1061-4036, 1546-1718. doi: 10.1038/ng.2504. URL <http://www.nature.com/articles/ng.2504>.
- [8] Schizophrenia Working Group of the Psychiatric Genomics Consortium. Biological insights from 108 schizophrenia-associated genetic loci. *Nature*, 511:421–427, 2014.
- [9] Denes Hnisz, Brian J. Abraham, Tong Ihn Lee, et al. Super-enhancers in the control of cell identity and disease. *Cell*, 155(4):934–947, 2013. ISSN 00928674. doi: 10.1016/j.cell.2013.09.053. URL <http://linkinghub.elsevier.com/retrieve/pii/S0092867413012270>.
- [10] Kerstin Lindblad-Toh, Manuel Garber, Or Zuk, et al. A high-resolution map of human evolutionary constraint using 29 mammals. *Nature*, 478(7370):476–482, 2011. ISSN 0028-0836, 1476-4687. doi: 10.1038/nature10530. URL <http://www.nature.com/articles/nature10530>.
- [11] Lucas D. Ward and Manolis Kellis. Evidence of abundant purifying selection in humans for recently-acquired regulatory functions. *Science*, 337(6102):1675–1678, 2012.
- [12] Robin Andersson, Claudia Gebhard, Irene Miguel-Escalada, Ilka Hoof, et al. An atlas of active enhancers across human cell types and tissues. *Nature*, 507(7493):455–461, 2014. ISSN 0028-0836, 1476-4687. doi: 10.1038/nature12787. URL <http://www.nature.com/articles/nature12787>.
- [13] Golnaz Vahedi, Yuka Kanno, Yasuko Furumoto, et al. Stretch-enhancers delineate disease-associated regulatory nodes in t cells. *Nature*, 520(7548):558–562, 2015.

- [14] Steven Gazal, Hilary K Finucane, Nicholas A Furlotte, et al. Linkage disequilibrium-dependent architecture of human complex traits shows action of negative selection. *Nature Genetics*, 49(10):1421–1427, 2017. ISSN 1061-4036, 1546-1718. doi: 10.1038/ng.3954. URL <http://www.nature.com/doifinder/10.1038/ng.3954>.
- [15] Eugene V. Davydov, David L. Goode, Marina Sirota, et al. Identifying a high fraction of the human genome to be under selective constraint using GERP++. *PLoS Computational Biology*, 6(12):e1001025, 2010. ISSN 1553-7358. doi: 10.1371/journal.pcbi.1001025. URL <http://dx.plos.org/10.1371/journal.pcbi.1001025>.
- [16] Farhad Hormozdiari, Steven Gazal, Bryce van de Geijn, et al. Leveraging molecular quantitative trait loci to understand the genetic architecture of diseases and complex traits. *Nature Genetics*, 50(7):1041–1047, 2018. ISSN 1061-4036, 1546-1718. doi: 10.1038/s41588-018-0148-2. URL <http://www.nature.com/articles/s41588-018-0148-2>.
- [17] Po-Ru Loh, George Tucker, Brendan K. Bulik-Sullivan, et al. Efficient bayesian mixed model analysis increases association power in large cohorts. *Nature Genetics*, 47(3):284–290, 2015.
- [18] Po-Ru Loh, Gleb Kichaev, Steven Gazal, et al. Mixed-model association for biobank-scale datasets. *Nature Genetics*, 50:906–911, 2018.
- [19] Graham McVicker, David Gordon, Colleen Davis, and Phil Green. Widespread genomic signatures of natural selection in hominid evolution. *PLoS Genetics*, 5(5):e1000471, 2009. ISSN 1553-7404. doi: 10.1371/journal.pgen.1000471. URL <http://dx.plos.org/10.1371/journal.pgen.1000471>.
- [20] Albert V. Smith, Daryl J. Thomas, Heather M. Munro, and Goncalo R. Abecasis. Sequence features in regions of weak and strong linkage disequilibrium. *Genome Research*, 15(11):1519–1534, 2005.
- [21] GTEx consortium. Genetic effects on gene expression across human tissues. *Nature*, 550(7675):204–213, 2017. ISSN 0028-0836, 1476-4687. doi: 10.1038/nature24277. URL <http://www.nature.com/doifinder/10.1038/nature24277>.
